# Supplementary material for: Design of PAMAM-COO dendron-grafted surfaces to promote Pb(ii) ion adsorption
Source: Royal Society of Chemistry journal article supplement (doi:10.1039/c5cp00309a), 2015-01-01
Supplement: c5cp00309a1.pdf [file c5cp00309a1.pdf]

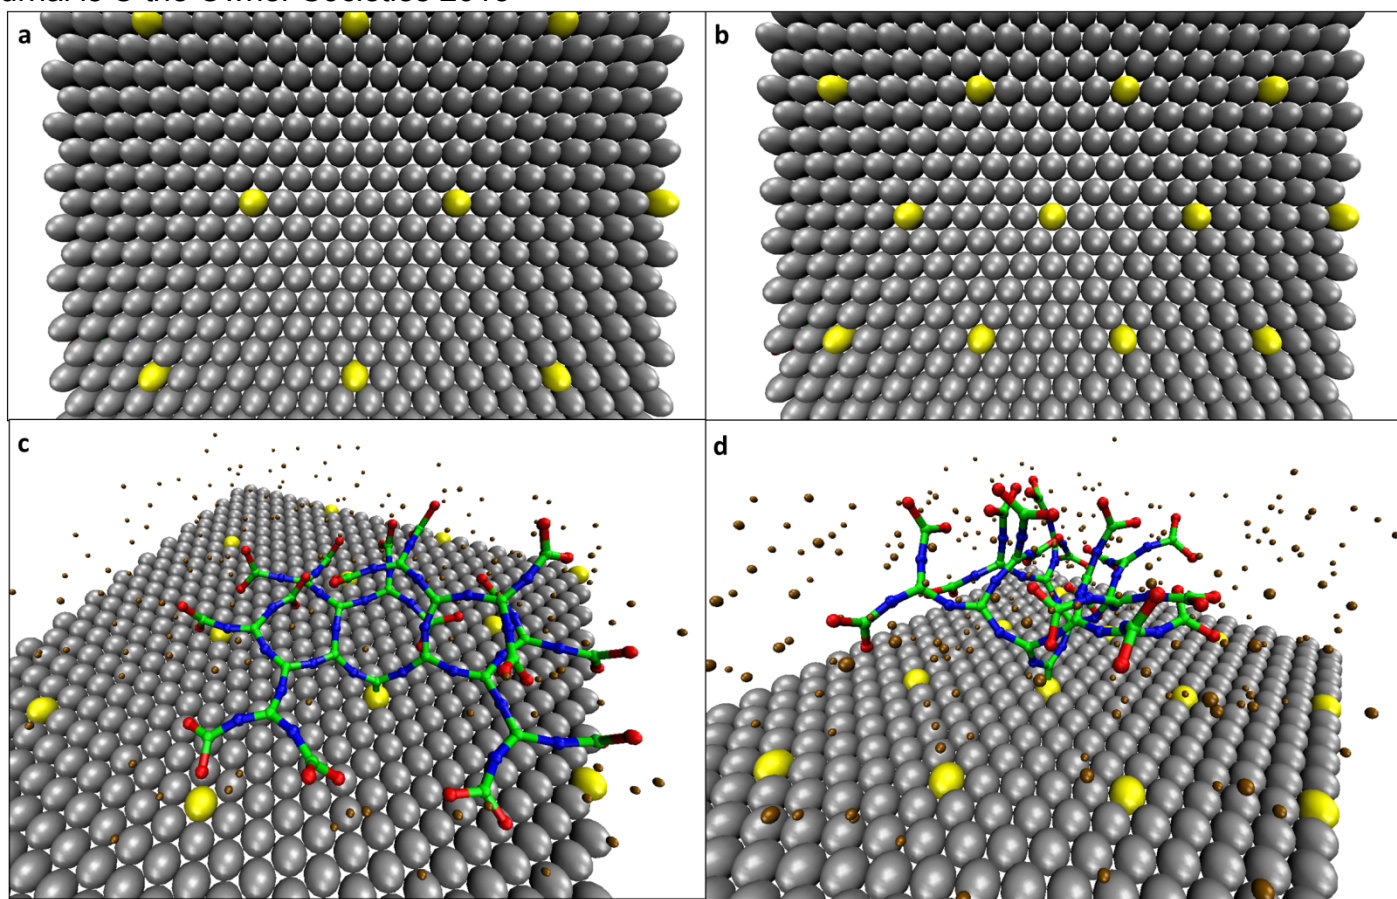

**Figure S11.** The tether points on a surface grafted with dendrons of generation G3.5 at (a) low and (b) high surface coverage level, (with the dendrons omitted). Simulation snapshot of the dendron brushes of generation G3.5, at (c) low and (d) high surface coverage levels. Silica (yellow), amine (green), amide (blue), carboxylate (red), and Pb (brown) groups are depicted.

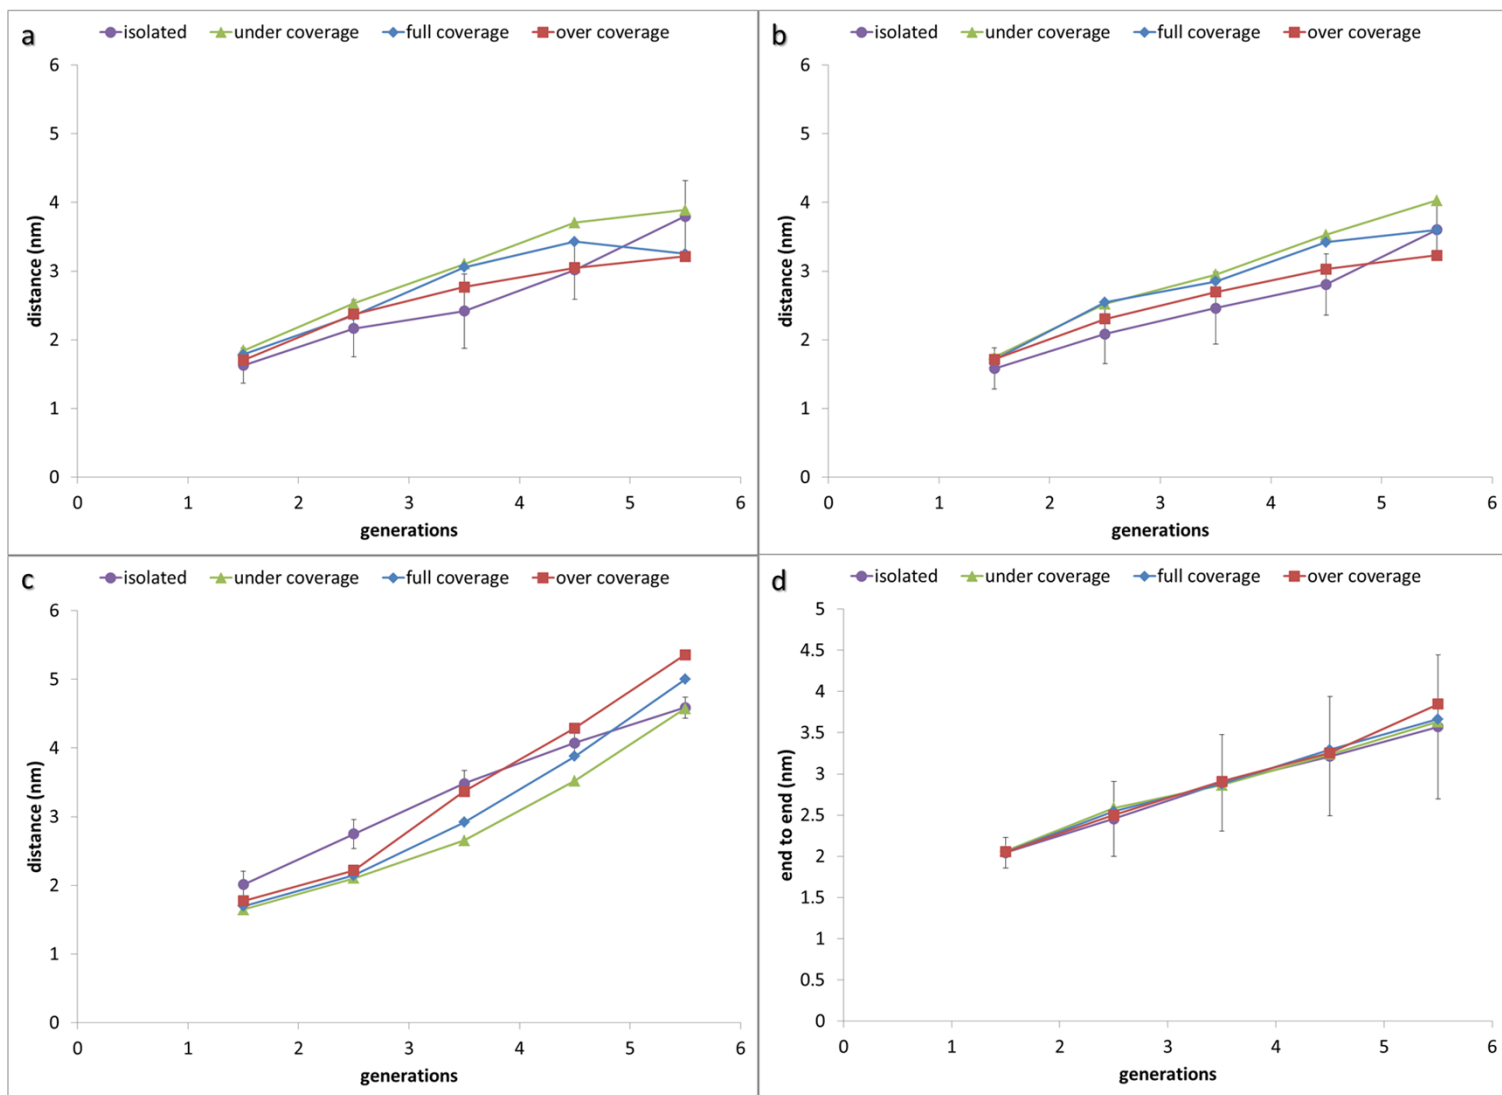

SI Figure 2. (a) x-, (b) y-, (c), z-, and (d) end-to-end dimensions of dendrimers.
